# Supplementary material for: Miscanthus grass-derived carbon dots to selectively detect Fe3+ ions
Source: PubMed Central journal article supplement — RSC Adv. 2019 Mar 14;9(15):8628–37. doi: 10.1039/c8ra10051a (PMC9061809; doi:10.1039/c8ra10051a), 2019-03-14
Supplement: RA-009-C8RA10051A-s001.pdf [file RA-009-C8RA10051A-s001.pdf]

**Supporting Information**

***Miscanthus* grass derived carbon dots to  
selectively detect Fe<sup>3+</sup> ions**

*Maisyn Picard,<sup>a,b</sup> Suman Thakur,<sup>a,b</sup> Manjusri Misra\*,<sup>a,b</sup> and Amar K.  
Mohanty\*,<sup>a,b</sup>*

<sup>a</sup> Bioproducts Discovery and Development Centre, Department of Plant Agriculture, Crop Science Building, University of Guelph, 50 Stone Road East, Guelph, Canada

<sup>b</sup> School of Engineering, Thornbrough Building, University of Guelph, 50 Stone Road East, Guelph, Canada

\*Corresponding authors.

E-mail addresses: AKM ([mohanty@uoguelph.ca](mailto:mohanty@uoguelph.ca)), \* MM ([mmisra@uoguelph.ca](mailto:mmisra@uoguelph.ca))

**Table S1:** Comparison of the detection of Fe<sup>3+</sup> ions using different synthesis methods

| <b>Method of Synthesis</b>    | <b>Material / Probe</b>                 | <b>Linear Range (<math>\mu\text{M L}^{-1}</math>)</b> | <b>Detection Limit (<math>\mu\text{M L}^{-1}</math>)</b> | <b>Reference</b> |
|-------------------------------|-----------------------------------------|-------------------------------------------------------|----------------------------------------------------------|------------------|
| Hydrothermal                  | Carbon dots                             | -                                                     | 1                                                        | 1                |
| Hydrothermal                  | Carbon quantum dots                     | 0–50                                                  | 1.3                                                      | 2                |
| Liquid N <sub>2</sub> Freezed | Carbon dots                             | 12.5–100                                              | 9.97                                                     | 3                |
| Comprised pyrolysis           | N and S co-doped CDs                    | 1–1000                                                | 0.81                                                     | 4                |
| Colorimetric                  | Functionalized Au NPs                   | -                                                     | 5.83                                                     | 5                |
| Thermal pyrolysis             | Carbon dots                             | 2–200                                                 | 0.67                                                     | 6                |
| Thermal pyrolysis             | Graphene quantum dots                   | 4–1800                                                | 1.2                                                      | 7                |
| Thermal pyrolysis             | Carbon quantum dots                     | 0–300                                                 | 13.68                                                    | 8                |
| Hydrothermal                  | N-doped carbon dots                     | 1–250                                                 | 0.52                                                     | 9                |
| -                             | Ir(III)-based luminescent               | 10–1500                                               | 2.9                                                      | 10               |
| Electropolymerization         | Polymer film                            | 10–1300                                               | 5.3                                                      | 11               |
| Hydrothermal                  | FNCDs                                   | 0–25                                                  | 0.9                                                      | 12               |
| Thermal                       | N-doped <i>Miscanthus</i><br>carbon dot | 0-500                                                 | 0.02                                                     | This work        |

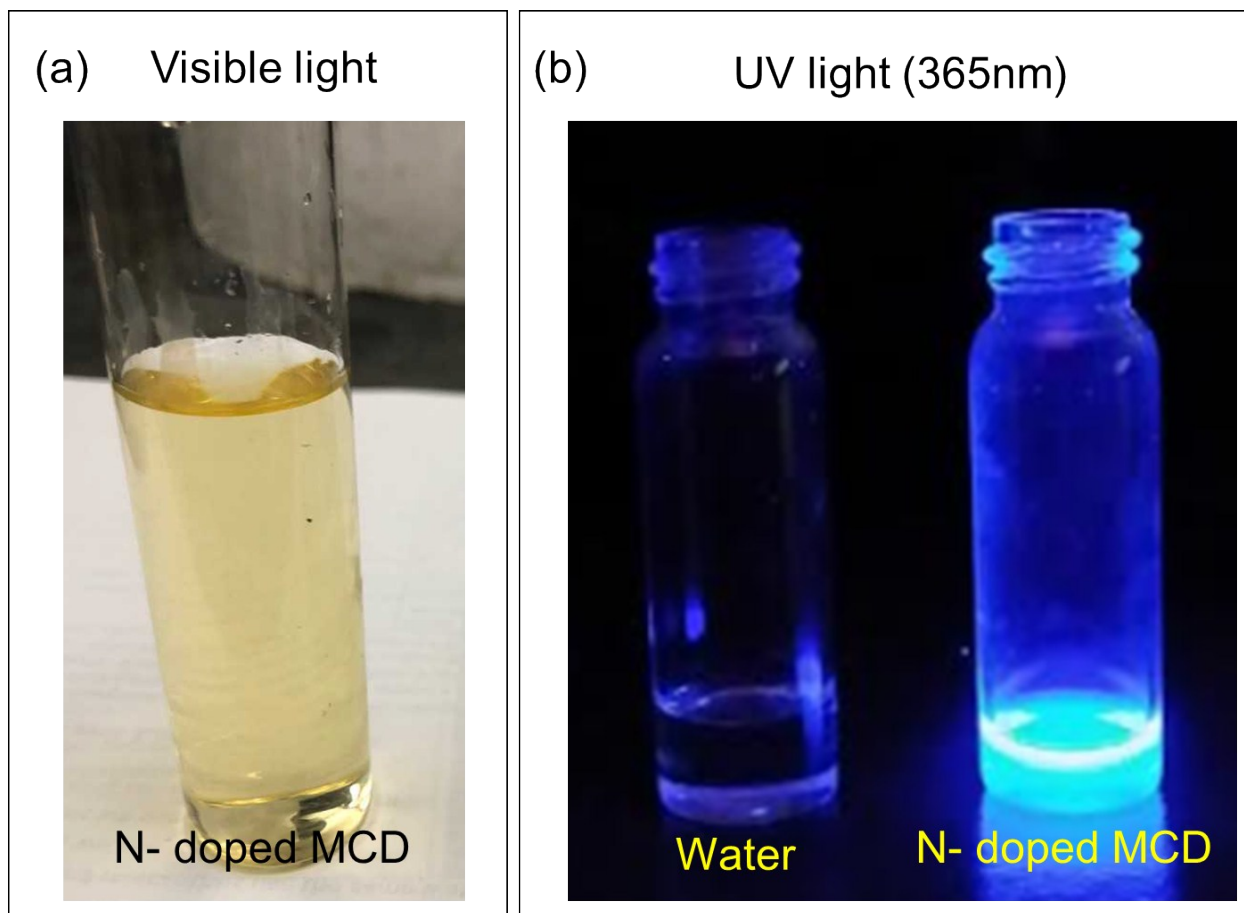

**Figure S1:** (a) digital image of N-doped MCD aqueous dispersion under visible light and (b) digital images of water and N-doped MCD aqueous dispersion under UV light (365 nm); N-doped MCD is showing blue fluorescent under UV light.

## References

1. Zhu, S., Meng, Q., Wang, L., Zhang, J., Song, Y., Jin, H., Zhang, K., Sun, H., Wang, H., Yang, B. Highly Photoluminescent Carbon Dots for Multicolor Patterning, Sensors, and Bioimaging, *Angew. Chem. Int. Ed.*, **2013**, *52*, 3953–3957.
2. Zhou, M., Zhou, Z., Gong, A., Zhang, Y., Li, Q., Synthesis of highly photoluminescent carbon dots via citric acid and Tris for iron(III) ions sensors and bioimaging, *Talanta* **2015**, *143*, 107–113.
3. Aslandas, A.M., Balci, N., Arık, M., Sakiroglu, H., Onganer, Y., Meral, K., Liquid nitrogen-assisted synthesis of fluorescent carbon dots from Blueberry and their performance in Fe<sup>3+</sup> detection, *Appl. Surf. Sci.* **2015**, *356*, 747–752.
4. Liu, Z., Xiao, J., Wu, X., Lin, L., Weng, S., Chen, M., Cai, X., Lin, X., Switch-on fluorescent strategy based on N and S co-doped graphene quantum dots (N-S/GQDs) for monitoring pyrophosphate ions in synovial fluid of arthritis patients, *Sens. Actuators B* **2016**, *229*, 217–224.
5. Buduru, P., Reddy B.C.S.R., Oxamic acid and p-aminobenzoic acid functionalized gold nanoparticles as a probe for colorimetric detection of Fe<sup>3+</sup> ion, *Sens Actuators B* **2016**, *237*, 935–943.
6. Gao, Z.F., Li, T.T., Xu, X.L., Liu, Y.Y., Luo, H.Q., Li, N.B., Green light-emitting polyepinephrine-based fluorescent organic dots and its application in intracellular metal ions sensing, *Biosens. Bioelectron.* **2016**, *83*, 134–141.
7. Xuan, W., Ruiyi, L., Saiying, F., Zaijun, L., Guangli, W., Zhiguo, G., Junkang, L., D-penicillamine-functionalized graphene quantum dots for fluorescent detection of Fe<sup>3+</sup> in iron supplement oral liquids, *Sens. Actuators B* **2017**, *243*, 211–220.
8. Xie, Z., Sun, X., Jiao, J., Xin X., D-penicillamine-functionalized graphene quantum dots for fluorescent detection of Fe<sup>3+</sup> in iron supplement oral liquids, *Colloids Surfaces A* **2017**, *529*, 38–44.
9. Song, Y., Zhu, C., Song, J., Li, H., Du, D., Lin, Y., Drug-Derived Bright and Color-Tunable N-Doped Carbon Dots for Cell Imaging and Sensitive Detection of Fe<sup>3+</sup> in Living Cells, *ACS Appl. Mater. Interfaces*, **2017**, *9*, 7399–7405.
10. Ko, C.N., Yang, C., Lin, S., Li, S., Dong, Z., Liu, J., Lee, S.M.Y., Leung, C.H., Ma D.L. A long-lived phosphorescence iridium(III) complex as a switch on-off-on probe for live zebrafish monitoring of endogenous sulfide generation, *Biosens. Bioelectron.* **2017**, *94*, 575–583.
11. Ding, W., Xu, J., Wen, Y., Zhang, J., Liu, H., Zhang, Z., Highly selective "turn-on" fluorescent sensing of fluoride ion based on a conjugated polymer thin film-Fe<sup>3+</sup> complex, *Anal. Chim. Acta* **2017**, *967*, 78–84.
12. Atchudan, R., Edison, T.N.J.E, Aseer, K.R., Perumal, S., Karthik, N., Lee, Y.R.. Highly fluorescent nitrogen-doped carbon dots derived from *Phyllanthus acidus* utilized as a fluorescent probe for label-free selective detection of Fe<sup>3+</sup> ions, live cell imaging and fluorescent ink, *Biosens. Bioelectron.* **2018**, *99*, 303-311.
